# Supplementary material for: Crystal engineering of microporous ‘Chinese-lantern’ compounds to improve their ability to reversibly adsorb sulfur dioxide
Source: Royal Society of Chemistry journal article supplement (doi:10.1039/b101263k), 2001-01-01
Supplement: b101263k.doc [file b101263k.doc]

**Electronic Supplementary Information**

Table D1. The crystallographically derived Mn and I site occupancies in

**[**Mn2(-dppO2)4I2]I2.CH3COCH3.4CH3OH, **4,** compared to those calculated for using 56% **a**, 14% **b** and 30% **c** . See Scheme below for defenition of **a**, **b** and **c**.

|  | Calculated site occupancies | **Actual site occupancies obtained from Least-Squares refinement** |
| --- | --- | --- |
| Central I | 0.44 | 0.443(1) |
| **Inner Mn** | 0.37 | 0.375(3) |
| **Outer Mn** | 0.63 | 0.625(3) |
| **Outer I** | 0.63 | 0.624(2) |
| **Calixarene I** | 0.15 | 0.126(2) |
|  |  |  |

### Sample preparation

[Mn2(-dppO2)4Cl2]Cl2.CH3COCH3.4CH3OH. **(2)** MnCl2 (1 equiv) and dppO2.H2O (2 equiv) were stirred together in acetone/methanol (1:1 for several hours, following which the solid was filtered off under suction, washed with diethyl ether and dried in vacuo. Yield: 80%; Mpt: 177-178C; Elemental analysis calculated for C108H104P8O8Mn2Cl4.2H2O: C 61.7, H 5.3, P 11.7; found: C 61.5, H 5.2, P 11.5.

[Mn2(-dppO2)4Br2]Br2.CH3COCH3.2CH3OH. **(3)** The same experimental technique was employed as in the synthesis of 2. Yield: 58%; Mpt: 164-166C; Elemental analysis calculated for C108H104P8O8Mn2Br4.2H2O: C 56.9 H 5.0 Br 14.0; found: C 57.1, H 5.0, Br 17.9. Crystals of 2 and 3 suitable for X-ray structural analysis, were grown by the vapor diffusion of diethyl ether onto an acetone/methanol (1:1) solution of the synthesized complex.

**[**Mn2(-dppO2)4I2]I2.CH3COCH3.4CH3OH. **(4)** MnI2 (1 equiv) was stirred with dppO2.H20 (2 equiv) in diethyl ether for several days. Elemental analysis based on C108H104P8O8Mn2I4.2H2O; C 52.6, H 4.6, I 20.6; found: C 52.1 H 4.6 I 20.9. Crystals of 4 were grown from the liquid diffusion of diethyl ether onto acetone/methanol (1:1).

TGA measurements were carried out by means of a CAHN TG-131. Exhaust gases from this instrument were fed to an enclosed powder sample in a Scintag XDS2000 powder diffractometer, employing copper radiation ( = 1.5418 Å) for simultaneous TGA/XRD analysis.

### Crystallography

† Crystal structure analysis for **2** : Nonius MACH-3 diffractometer, graphite monochromated Mok,  = 0.71073 Å, 223 K. Data collection and refinement: -2, corrections for Lorentz and polarization effects and absorption using -scans ( = 5.14 cm-1). The structure was solved using Direct methods and refined by full-matrix least-squares SHELXS, SHELXL, SHELXS97.C115H126O13P8Mn2Cl4 , tetragonal, space group I4/m, a = b = 14.382(3), c = 26.076(9) Å, V = 5393(2) Å3 , Z = 2 , calc = 1.366 g cm-1 , 0  2  50o, crystal dimensions 0.20  0.20  0.15 mm3. 2645 reflections measured, 2441 unique (Rint = 0.053). Hydrogen atoms of disordered acetone (4/m site) and methanol molecules (mirror plane) were ignored. Each manganese atom was divided equallybetween two sites , Mn(1) and Mn(2) and the external capping chlorine site, Cl(2A), was also semi-populated. Refinement of 180 variables with anisotropic parameters for all non-hydrogen atoms resulted in wR2 = 0.152 for all reflections and R1 = 0.070 for 1321 reflections [I>2(I)] , S = 1.07.

Crystal structure analysis for **3** : Nonius MACH-3 diffractometer, graphite monochromated Mok,  = 0.71073 Å, 223 K. Data collection and refinement: -2, corrections for Lorentz and polarization effects and absorption using -scans ( = 18.74 cm-1). The structure was solved using Direct methods and refined by full-matrix least-squares SHELXS, SHELXL, SHELXS97.C115H126O13P8Mn2Br4 , tetragonal, space group I4/m, a = b = 14.523(4), c = 25.874(12) Å, V = 5457(3) Å3 , Z = 2 , calc = 1.458 g cm-1 , 0  2  50o, crystal dimensions 0.30  0.30  0.20 mm3. 2750 reflections measured, 2750 unique. Hydrogen atoms of disordered acetone (4/m site) and methanol molecules (mirror plane) were ignored. Each manganese atom was divided equally between two sites , Mn(1) and Mn(2) and the external capping bromine site, Br(2A), was also semi-populated. Refinement of 180 variables with anisotropic parameters for all non-hydrogen atoms resulted in wR2 = 0.158 for all reflections and R1 = 0.073 for 1500 reflections [I>2(I)] , S = 1.03.

Crystal structure analysis for **4** : Bruker SMART 2000 diffractometer, graphite monochromated Mok,  = 0.71073 Å, 223 K. Data collection and refinement: narrow range data sets, corrections for Lorentz and polarization effects and absorption using empirical ellipsoidal method (14.55cm-1). The structure was solved using Direct methods and refined by full-matrix least-squares SHELXS, SHELXL, SHELXS97.C115H126O13P8Mn2I4 , tetragonal, space group I4/m, a = b = 14.984(4), c = 25.761(12) Å, V = 5784(3) Å3 , Z = 2 , calc = 1.483 g cm-1 , 0  2  61o, crystal dimensions 0.18  0.10  0.05 mm3. 29054 reflections measured, 4499 unique (Rint = 0.079). Hydrogen atoms of disordered acetone (4/m site) and methanol molecules (mirror plane) were ignored. Refinement of 179 variables with anisotropic parameters for all non-hydrogen atoms resulted in wR2 = 0.100 for all reflections and R1 = 0.041 for 2103 reflections [I>2(I)] , S = 0.84. Crystal drawing were prepared using WebLab Viewer. Crystallographic data (excluding structure

| X |
| --- |

*a* Footnote text.

**Table XX** Caption

| X |
| --- |

*a* Footnote text.

| X | (X) |
| --- | --- |
